# Supplementary material for: Synthesis of graphene oxide with a lower band gap and study of charge transfer interactions with perylenediimide
Source: Royal Society of Chemistry journal article supplement (doi:10.1039/d0nj01906b), 2020-01-01
Supplement: d0nj01906b1.pdf [file d0nj01906b1.pdf]

## **Supporting Information**

Synthesis of graphene oxide with lower band gap and study of charge transfer  
interaction with perylenediimide

Komal Bhardwaj,<sup>1,2</sup> Rachana Kumar,<sup>1,2\*</sup> Naveen Joy Kindo,<sup>1</sup> Nikita Vashistha,<sup>2,3</sup> Akhilesh Kumar Patel,<sup>4</sup> Mahesh Kumar,<sup>2,3</sup> Pramod Kumar,<sup>5</sup>

<sup>1</sup>Photovoltaic Metrology Group, Advanced Materials and Devices Metrology Division, CSIR-National Physical Laboratory, Dr. K. S. Krishnan Marg, New Delhi, India-110012

<sup>2</sup>Academy of Scientific and Innovative Research, HRDC Campus-Ghaziabad, India-201002

<sup>3</sup>Photonics Materials Metrology Group, Advanced Materials and Devices Metrology Division, CSIR-National Physical Laboratory, Dr. K. S. Krishnan Marg, New Delhi, India-110012

<sup>4</sup>Magnetic Materials Laboratory, Department of Physics, Indian Institute of Technology Bombay, Mumbai, India-400076

<sup>5</sup>Spintronics and Magnetic Materials Laboratory, Indian Institute of Information Technology, Allahabad, Uttar Pradesh India-211015

---

\*Corresponding Authors

E-mail: rachanak.npl@nic.in, rachanasinghchem@gmail.com (Rachana Kumar)

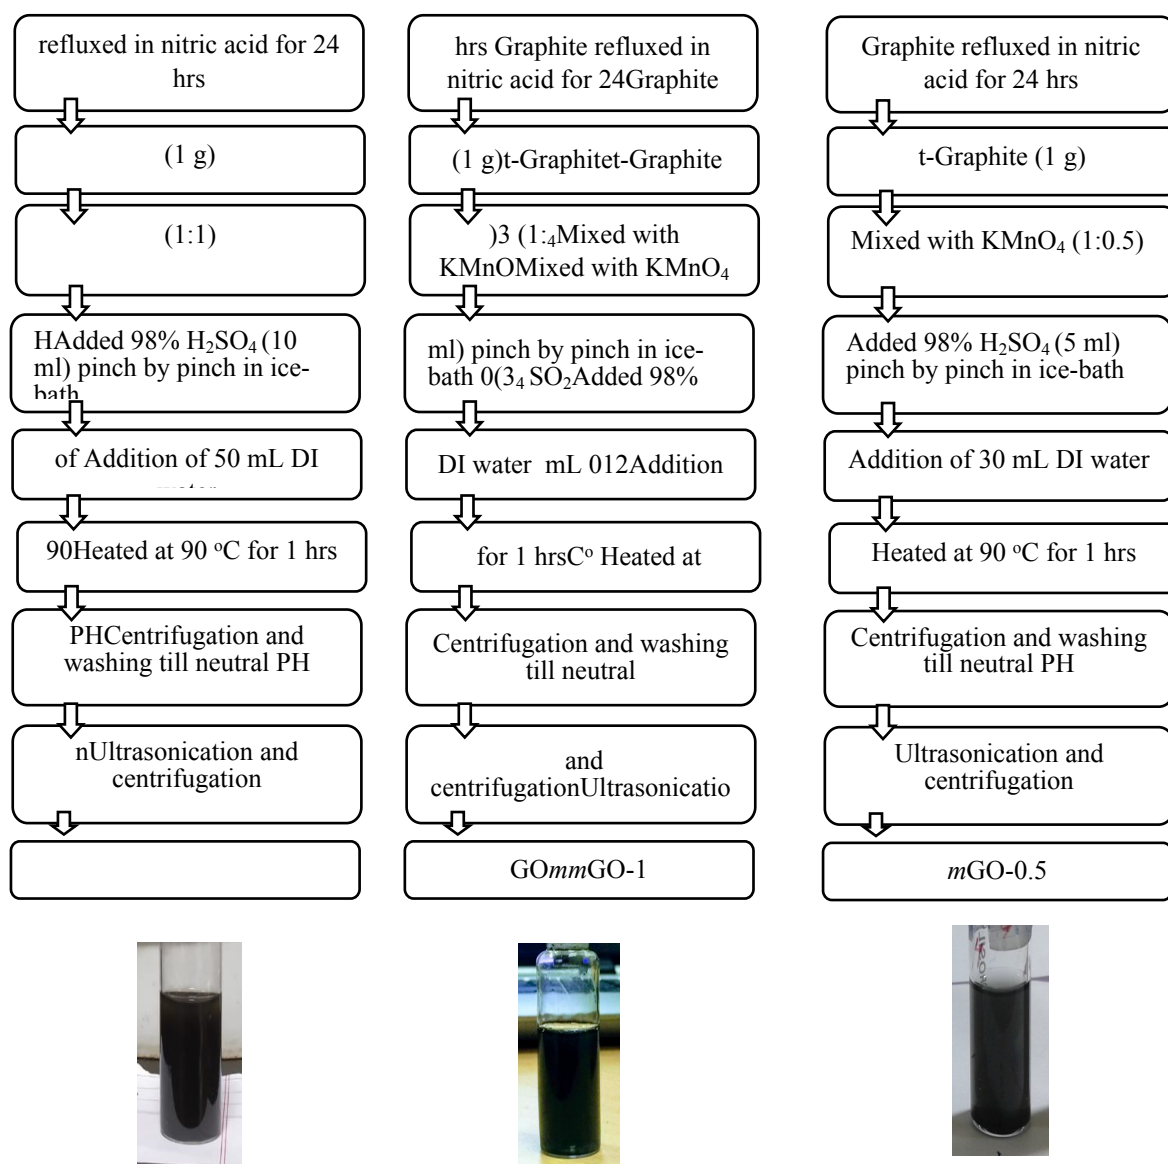

Scheme S1. Synthesis scheme of mGO, mGO-1 and mGO-0.5 with the photograph of their dispersion in water (1mg/mL).

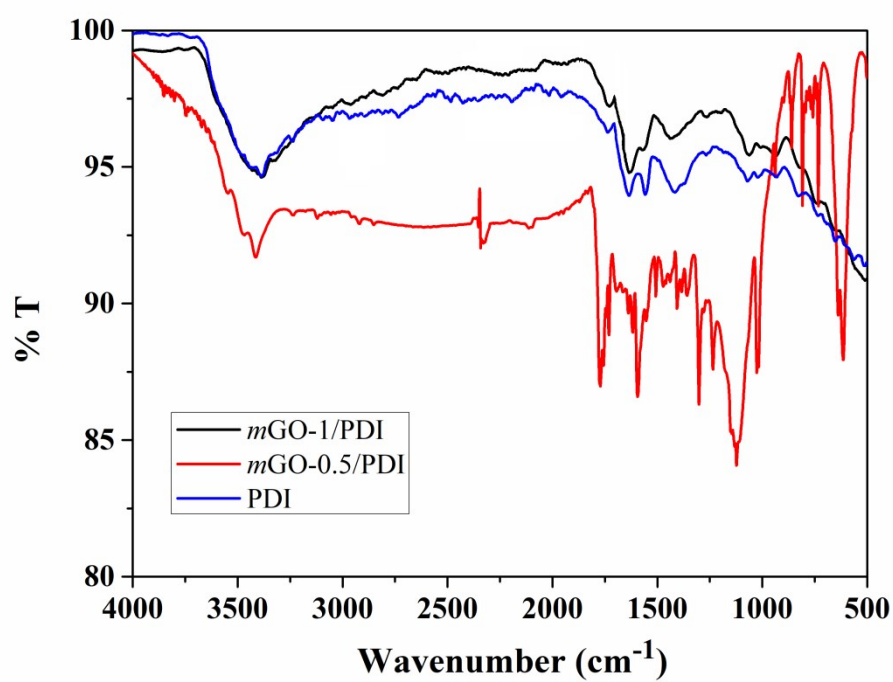

Figure S1a. FTIR spectra of PDI, mGO-1/PDI and mGO-0.5/PDI.

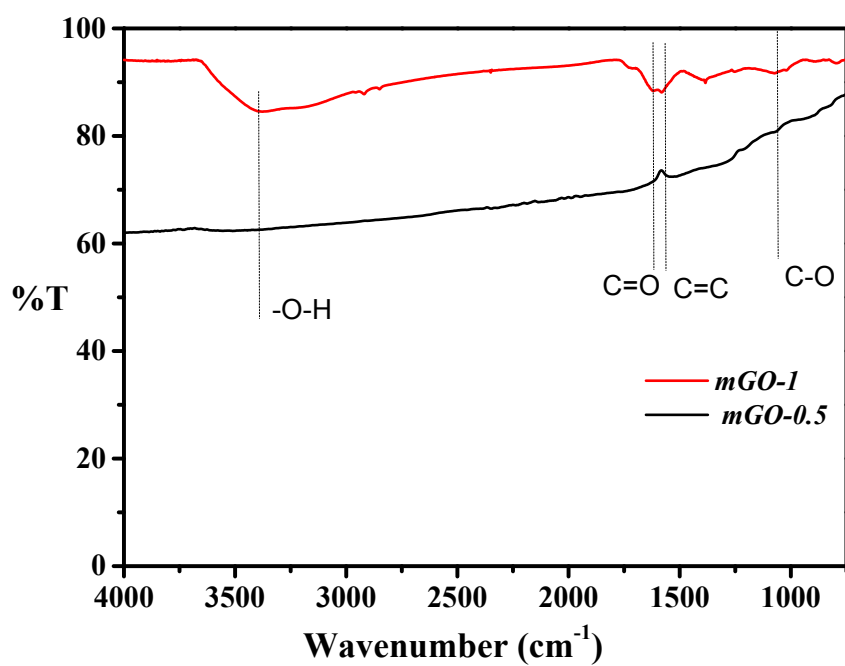

Figure S1b. FTIR spectra of mGO-1 and mGO-0.5.

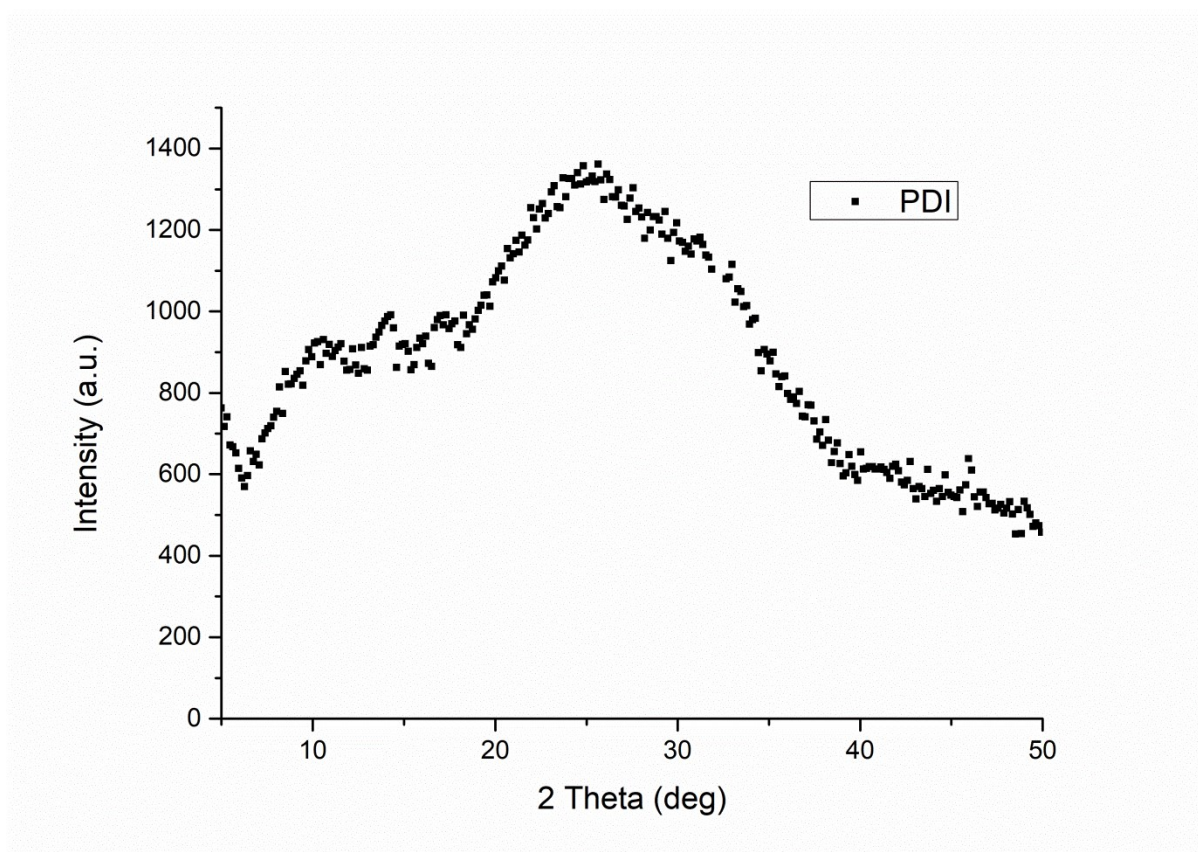

Figure S2. XRD of PDI in film.

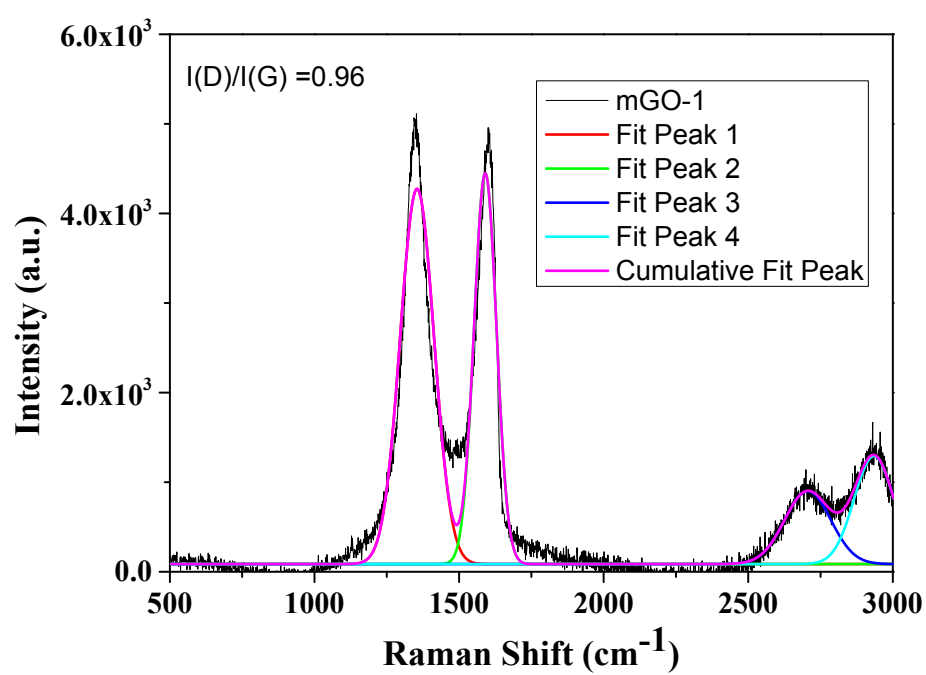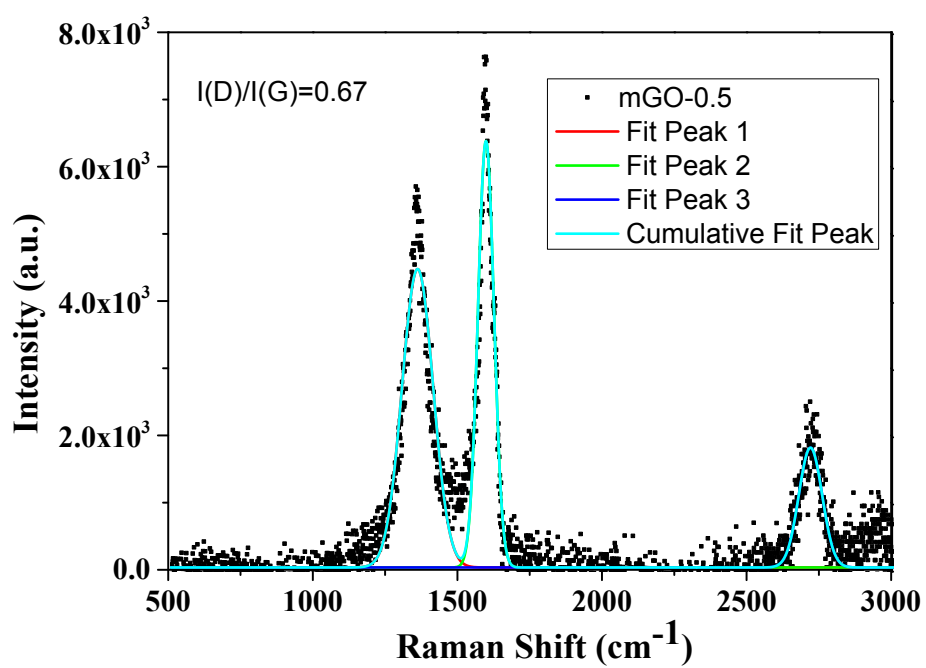

Figure S3. Fitting of Raman spectra of mGO-1 and mGO-0.5 with Gaussian line for calculation of  $I(D)/I(G)$  value.

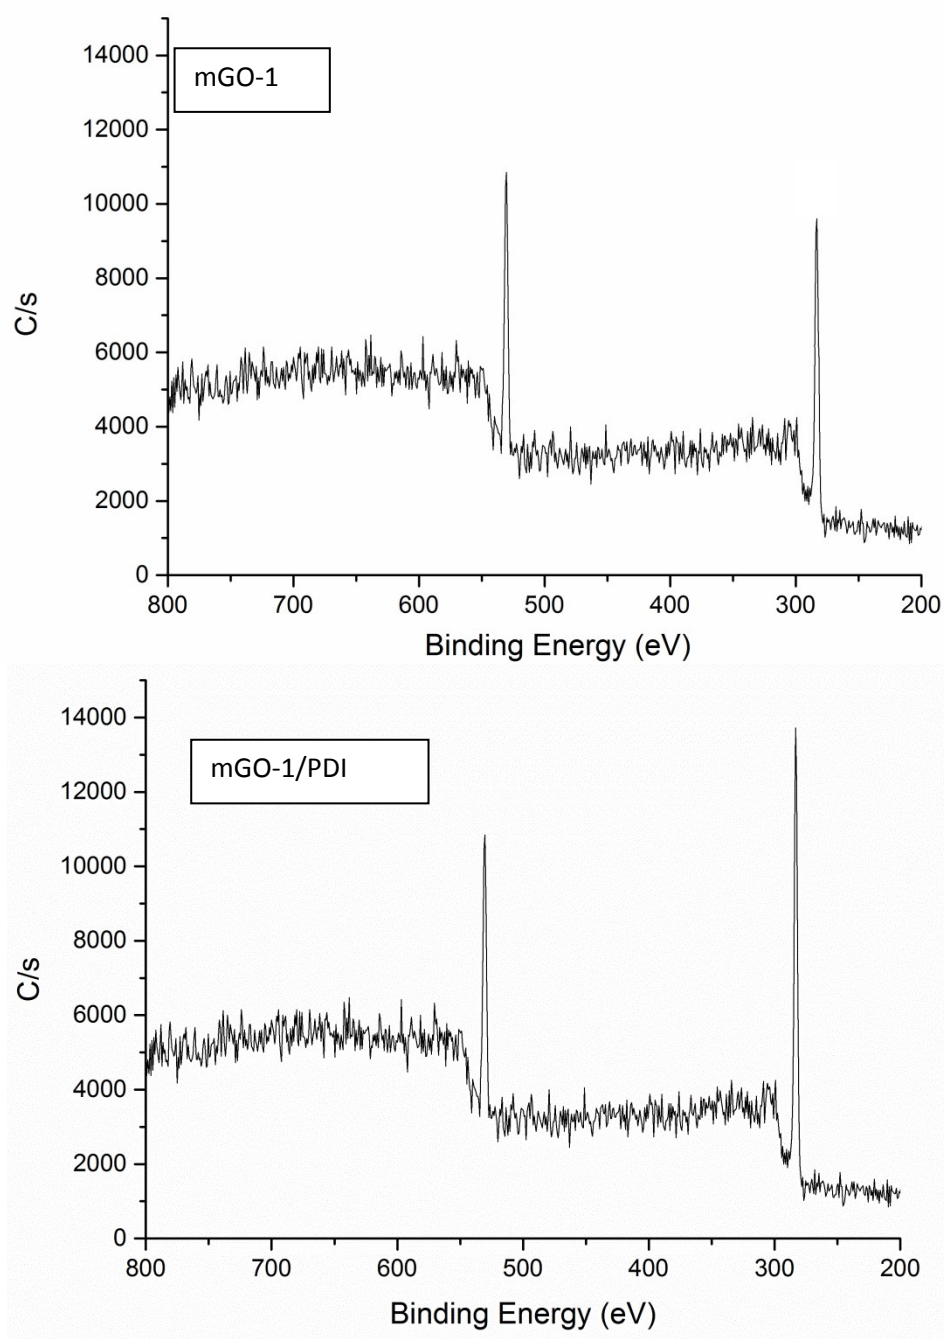

Figure S4a. XPS survey spectra of *mGO-1* and *mGO-1/PDI*.

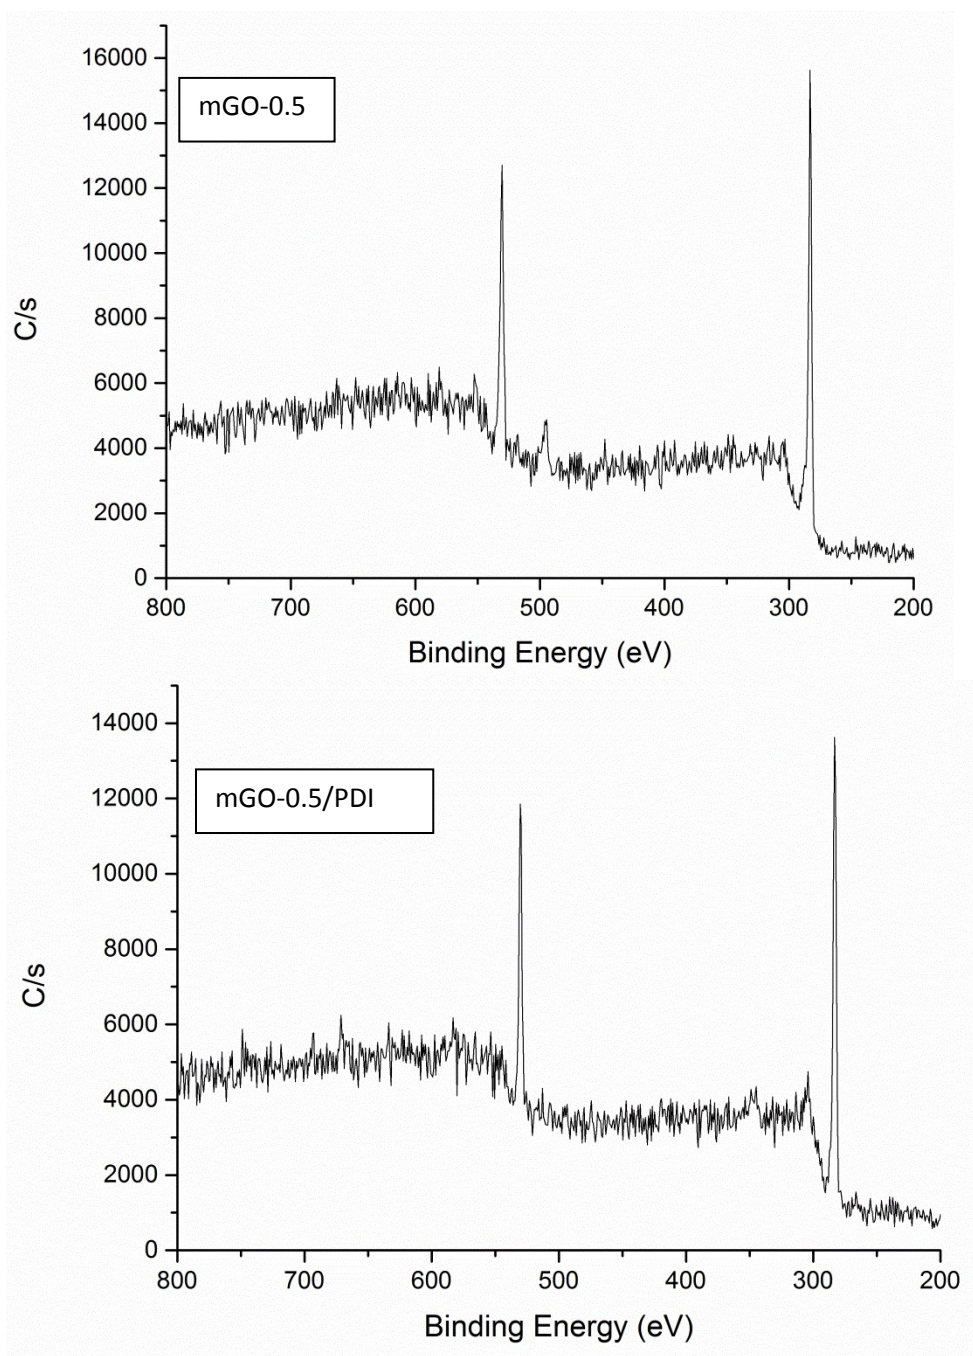

Figure S4b. XPS survey spectra of *mGO-0.5* and *mGO-0.5/PDI*.

(i)

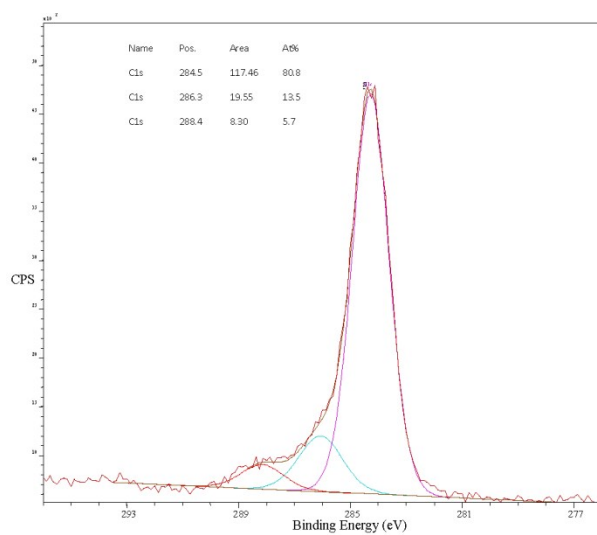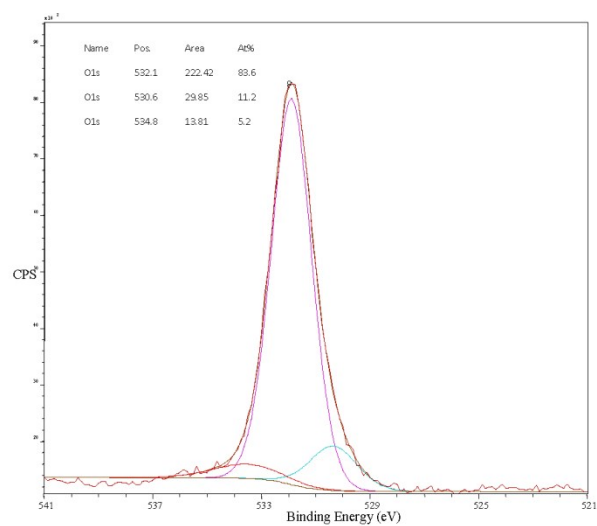

(ii)

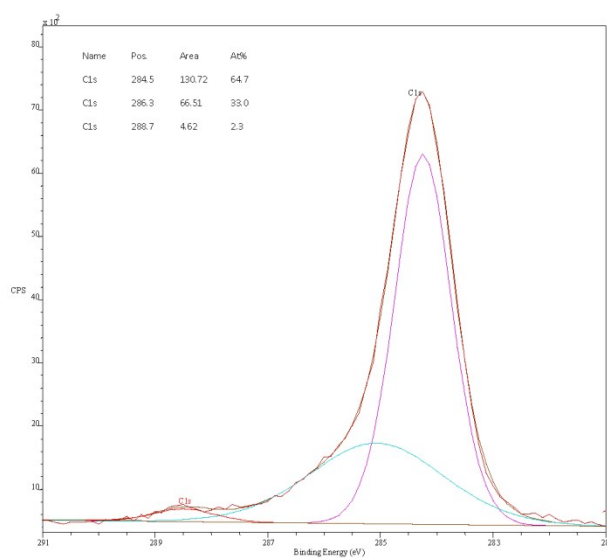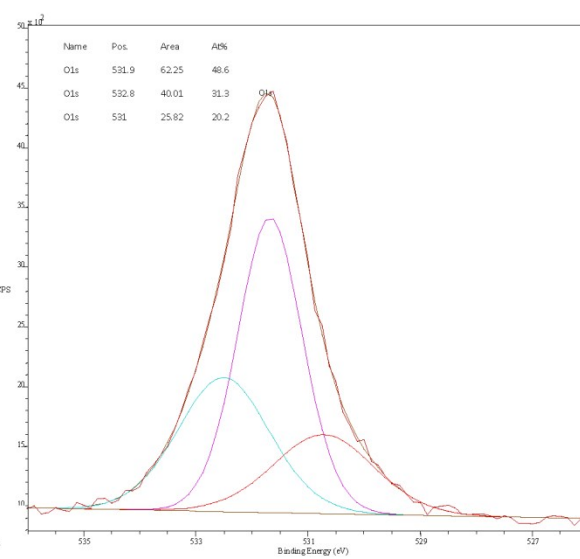

Figure S4c. C1s and O1s core level XPS peak fit of (i) *mGO-1*, and (ii) *mGO-1/PDI*.

(i)

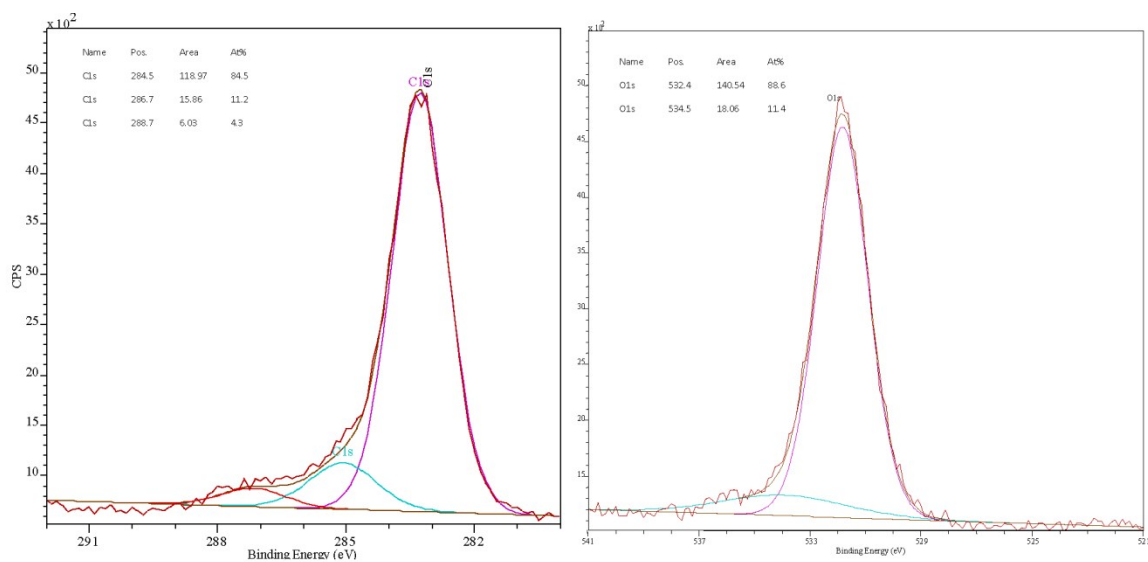

(ii)

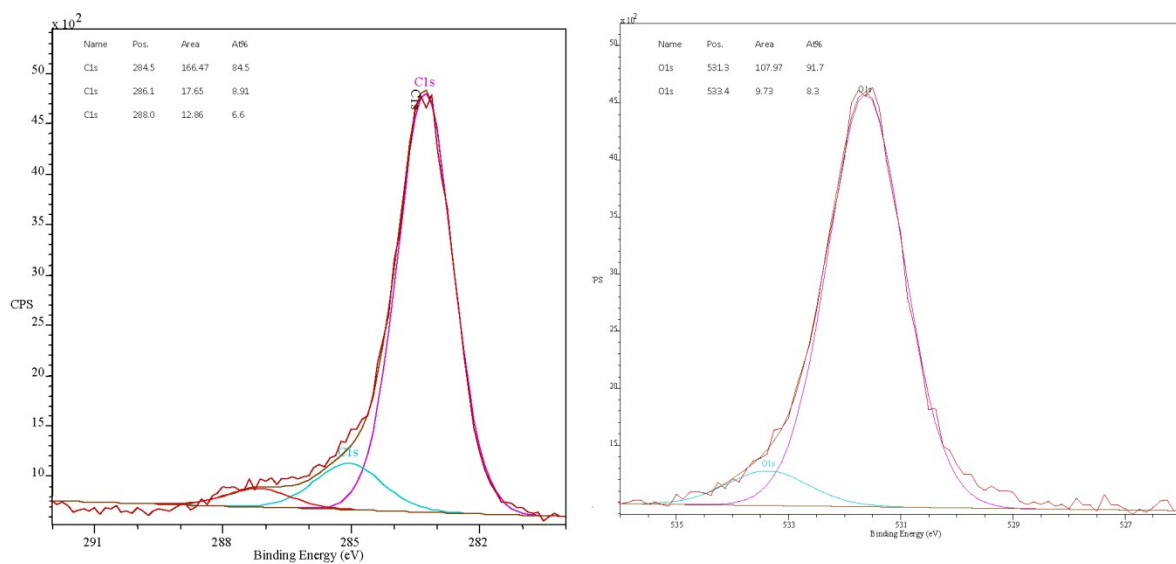

Figure S4d. C1s and O1s core level XPS peak fit of (i) mGO-0.5, and (ii) mGO-0.5/PDI.

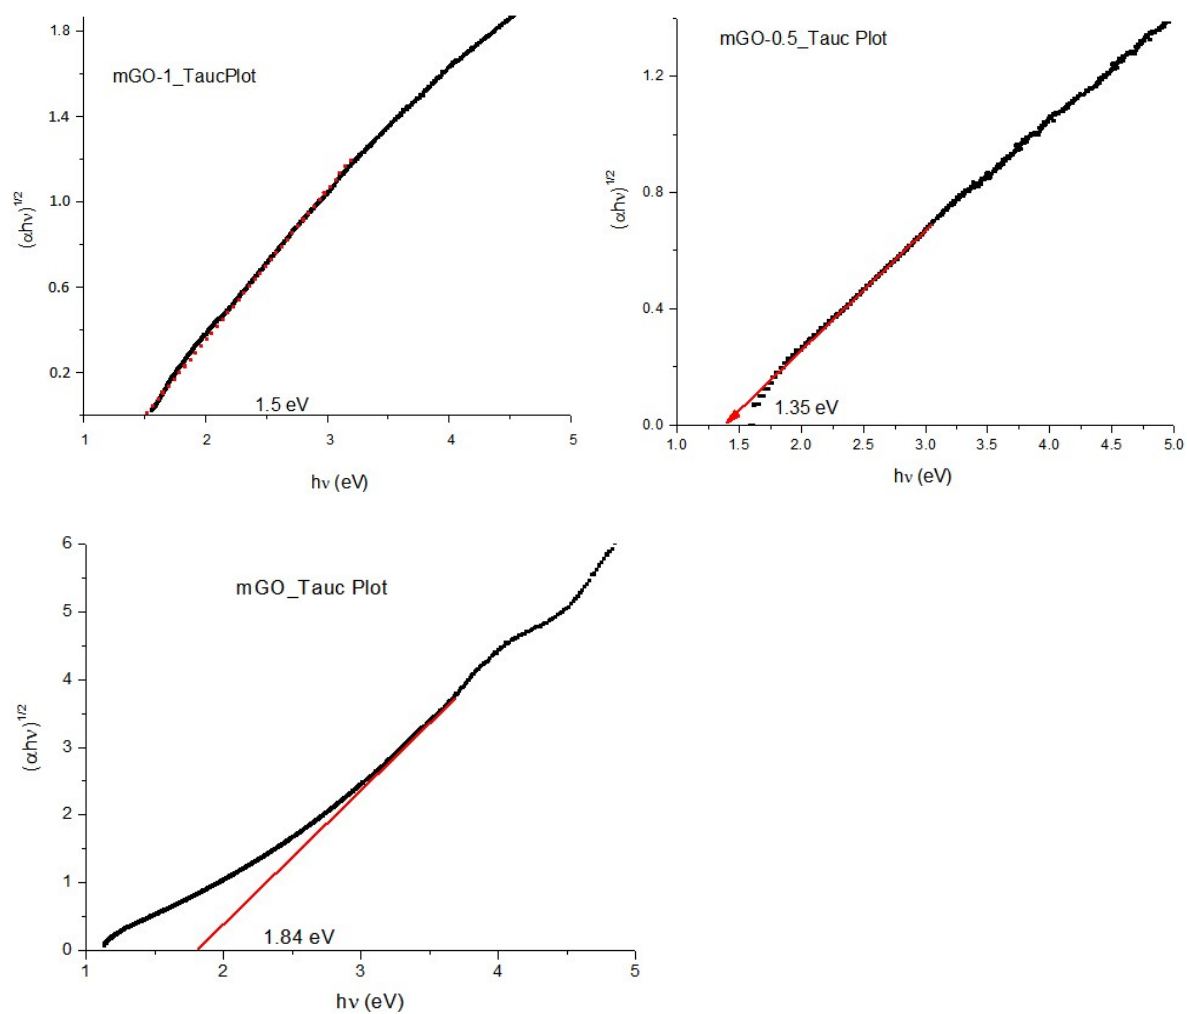

Figure S5. Tauc plot of mGO-1, mGO-0.5 and mGO for band gap estimation.

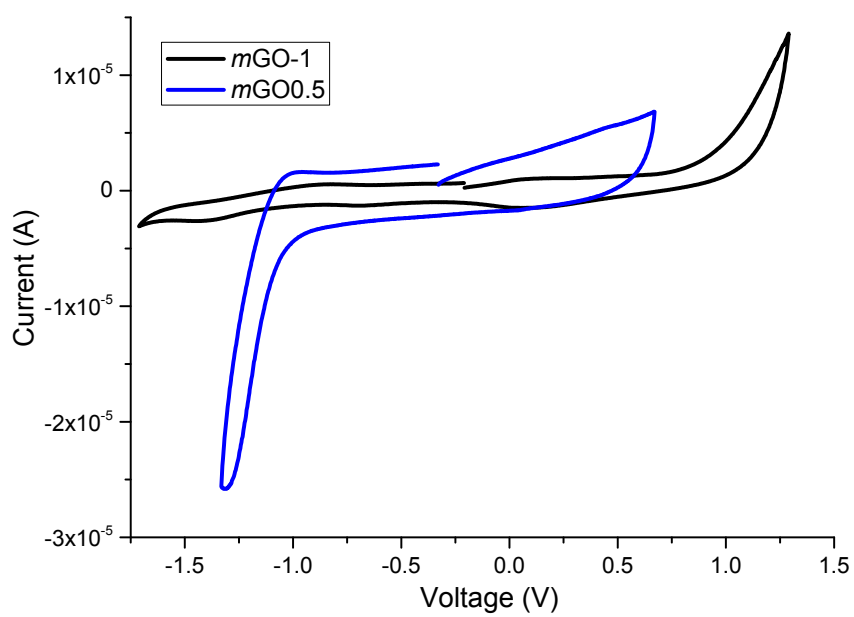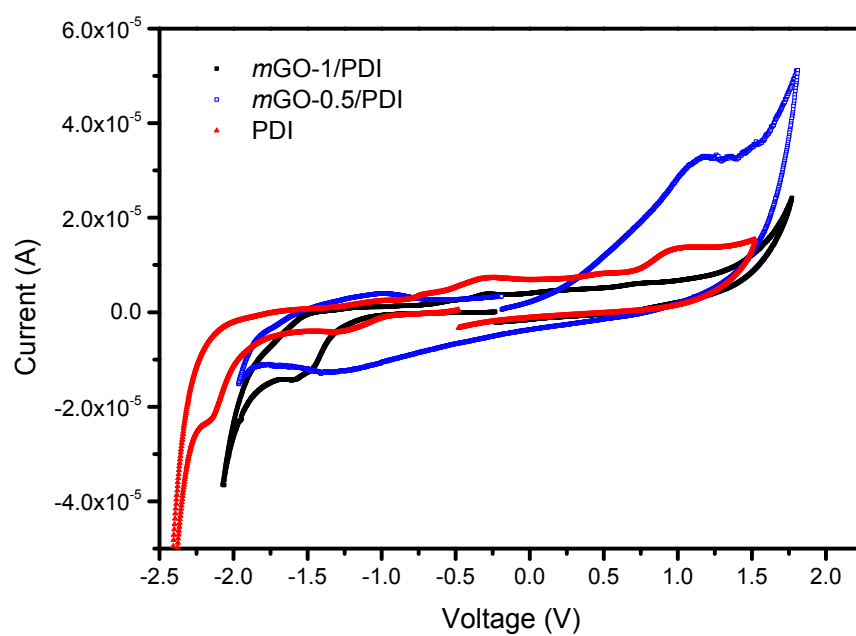

Figure S6. Cyclic voltammogram of *mGO-1*, *mGO-0.5*, PDI and GO hybrids with PDI.

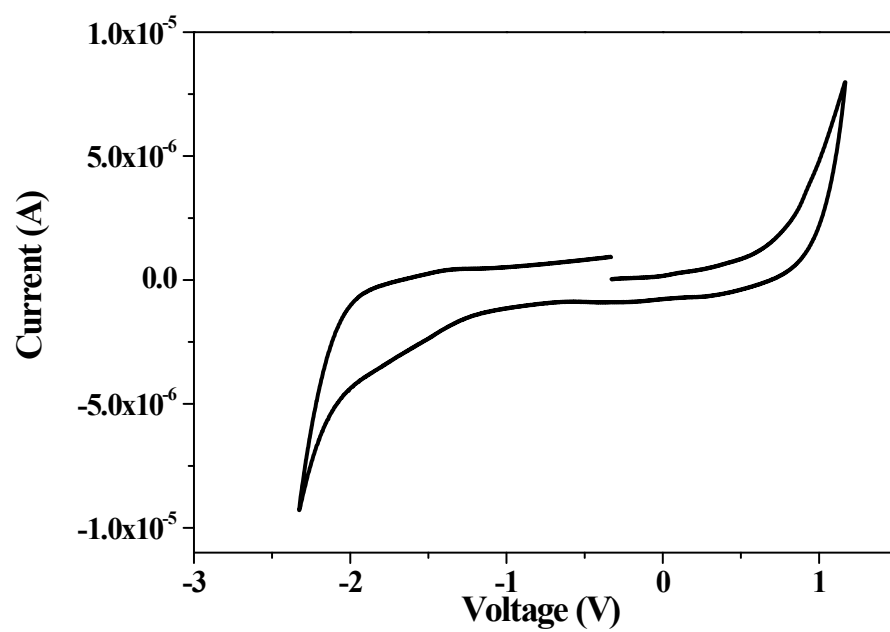

Figure S7. Cyclic votammogram of mGO drop casted on working.

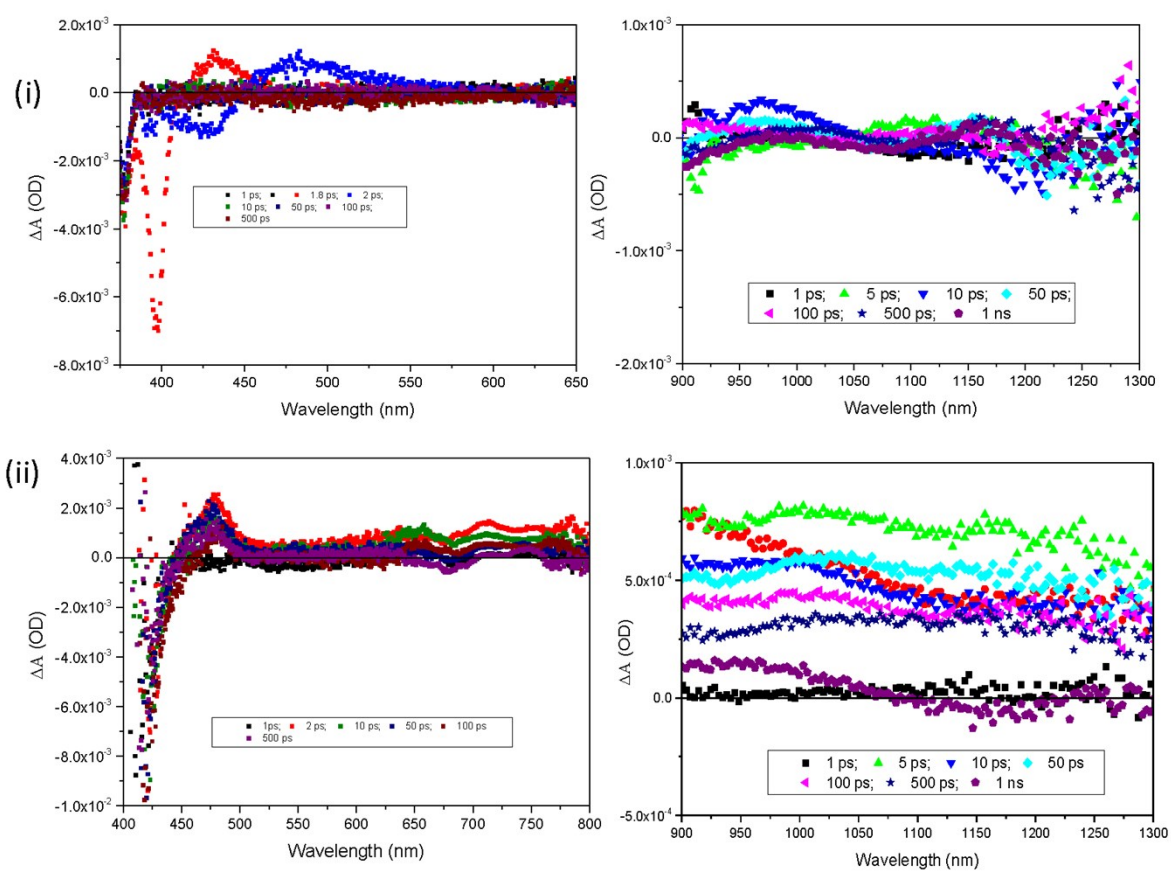

Figure S8. Transient absorption spectra of (i) mGO-1 and (ii) mGO-1/PDI hybrid recorded in visible and NIR region.

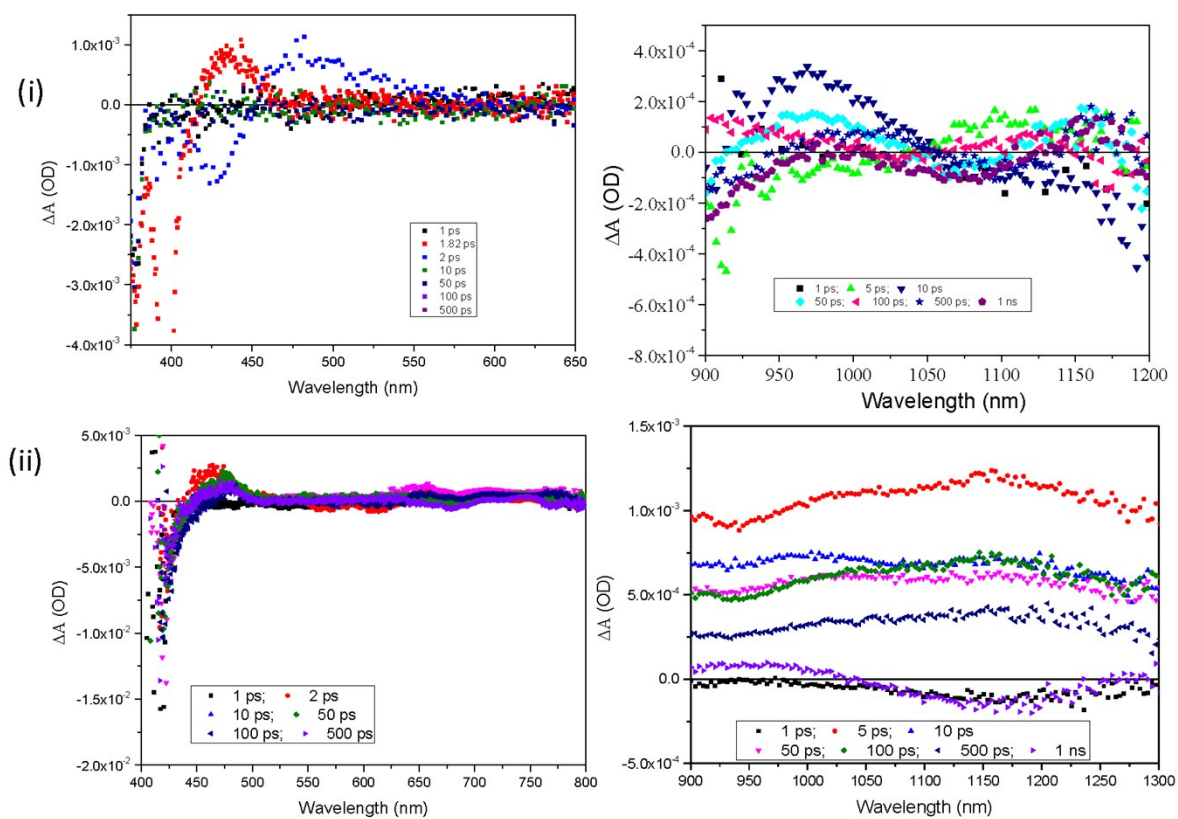

Figure S9. Transient absorption spectra of (i) mGO-0.5 and (ii) mGO-0.5/PDI hybrid recorded in visible and NIR region.
